# Supplementary material
Source: Springer Nature journal article supplement (https://www.springermedizin.de/resource/supplementary/12990_2010_301_MOESM5_ESM.pdf/9612984)

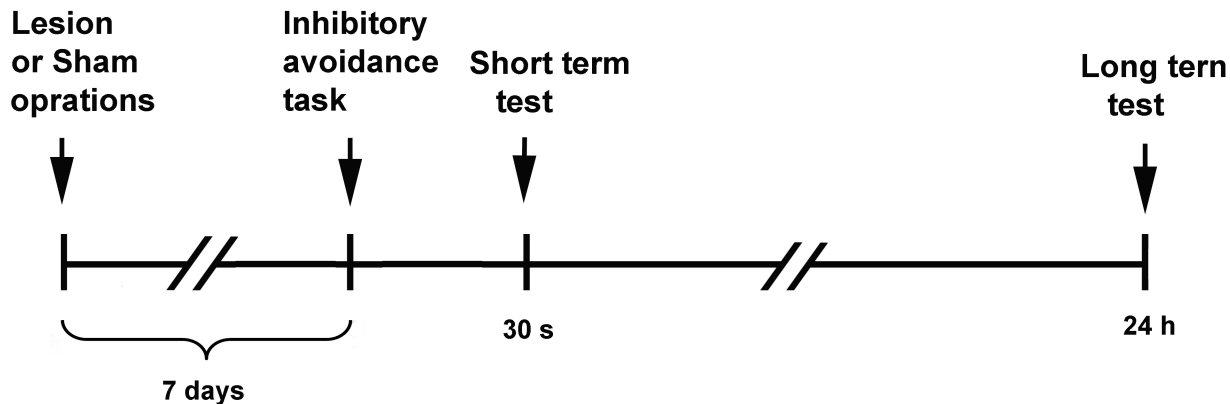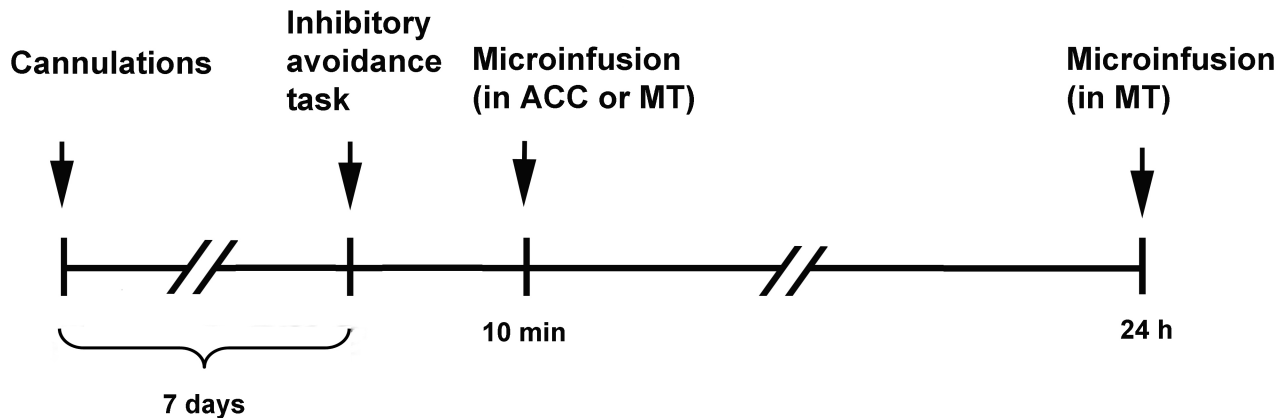

Supplement: MOESM5 [file 9612984]
